# Supplementary material for: Exchanges of genomic domains between poliovirus and other cocirculating species C enteroviruses reveal a high degree of plasticity
Source: PubMed Central journal article supplement (PMC5153852; doi:10.1038/srep38831), 2016-12-13
Supplement: srep38831-s1.pdf [file srep38831-s1.pdf]

**Exchanges of genomic domains between poliovirus and other cocirculating  
species C enteroviruses reveal a high degree of plasticity**

Maël Bessaud, Marie-Line Joffret, Bruno Blondel, Francis Delpeyroux

**Supplementary Information**

**Supplementary Fig. S1. Nucleotide divergences between three viruses recovered from dead or paralyzed mice and the corresponding viruses before inoculation.** The consensus sequences were determined through Sanger sequencing. The non-synonymous divergences are in red. The numbering is according to that of the parental strains.

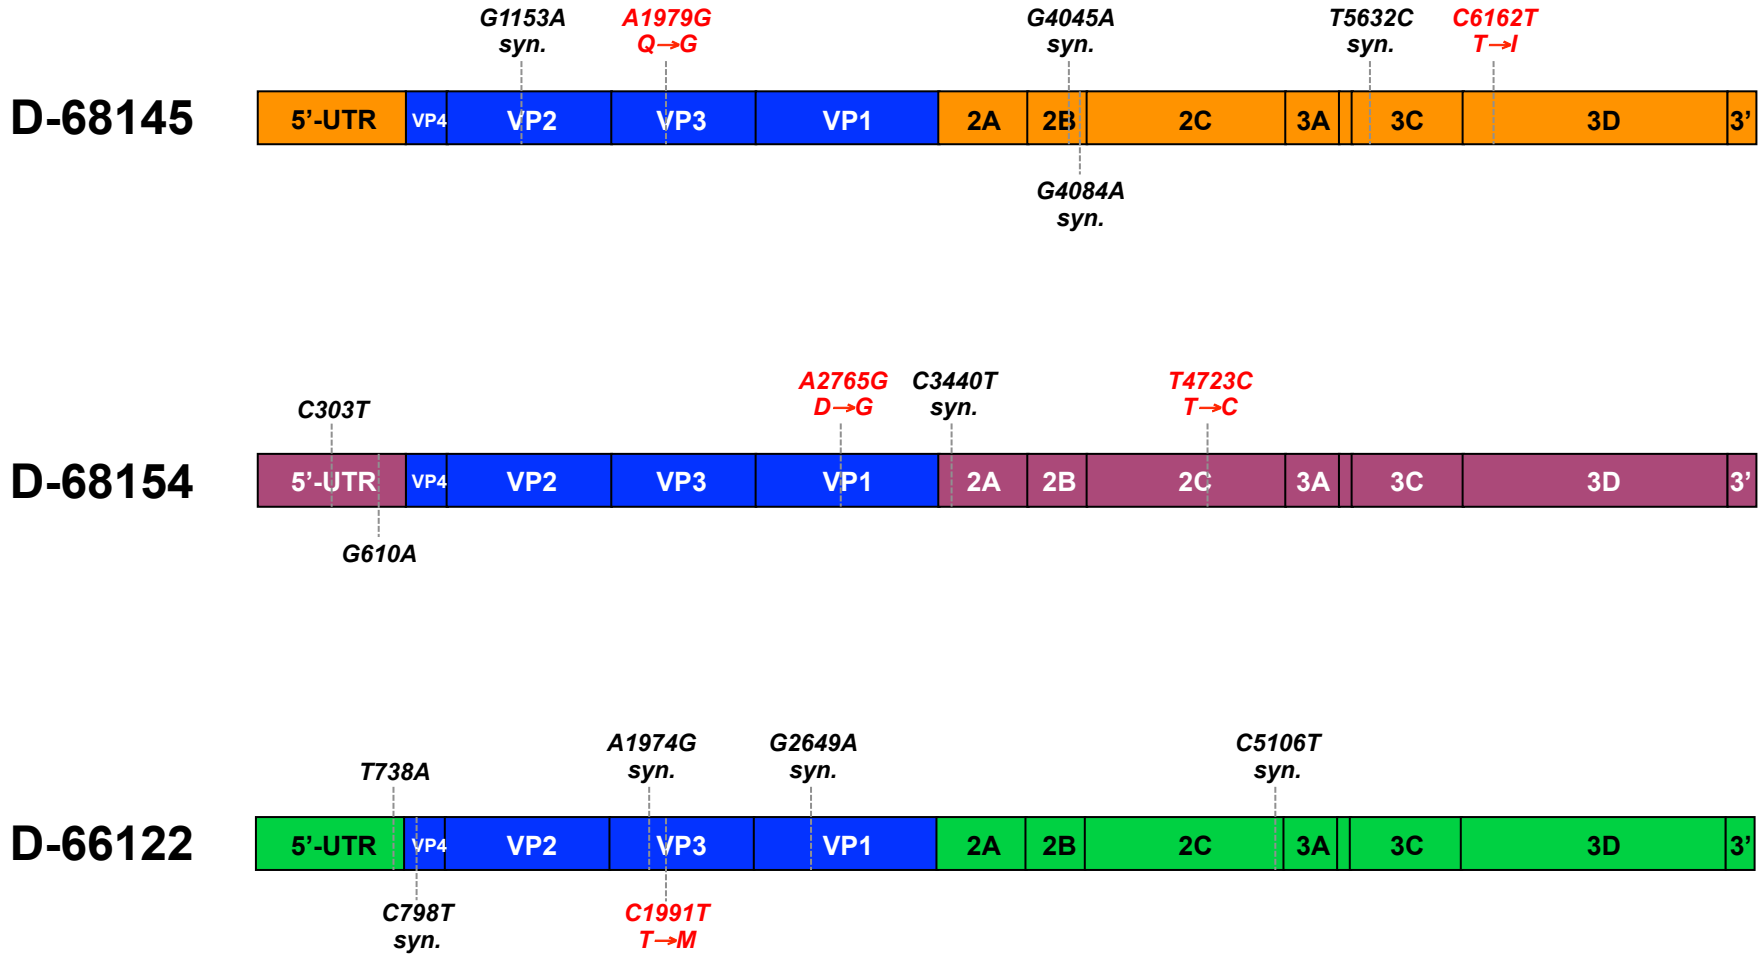

Supplementary Fig. S2. Alignment of the *cre* minimal domains (highlighted in grey) of Sabin 2 and EV-C99 68229.

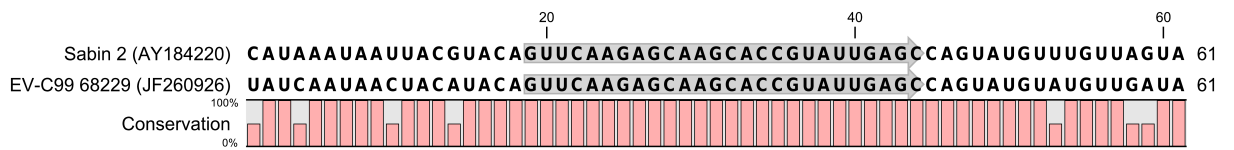

Supplementary Table S1. List of the primers used to generate the recombinant genomes.

| Genome         | Amplicon 1     |                | Amplicon 2     |                | Amplicon 3     |                | Amplicon 4     |                |
|----------------|----------------|----------------|----------------|----------------|----------------|----------------|----------------|----------------|
|                | Forward primer | Reverse primer | Forward primer | Reverse primer | Forward primer | Reverse primer | Forward primer | Forward primer |
| <b>F-68229</b> | Extr5          | 68229.37.c     | S2.048.d       | S2.022.c       | 68229.25.d     | 68229.27.c     | S2.034.d       | S3.002.c       |
| <b>E-68229</b> | S2.017.d       | S2.022.c       | 68229.25.d     | 68229.27.c     | S2.034.d       | S3.002.c       |                |                |
| <b>D-67001</b> | Extr5          | 67001.07.c     | S2.038.d       | S2.018.c       | 67001.06.d     | S3.002.c       |                |                |
| <b>D-68145</b> | Extr5          | 68145.24.c     | S2.047.d       | S2.020.c       | 68145.21.d     | S3.002.c       |                |                |
| <b>D-68095</b> | Extr5          | 68095.18.c     | S2.037.d       | S2.019.c       | 68095.17.d     | S3.002.c       |                |                |
| <b>D-68229</b> | Extr5          | 68229.37.c     | S2.048.d       | S2.022.c       | 68229.25.d     | S3.002.c       |                |                |
| <b>D-68154</b> | Extr5          | 68154.29.c     | S2.036.d       | S2.021.c       | 68154.28.d     | S3.002.c       |                |                |
| <b>D-67610</b> | Extr5          | 67610.23.c     | S2.049.d       | S2.031.c       | 67610.20.d     | S3.002.c       |                |                |
| <b>D-66122</b> | Extr5          | 66122.34.c     | S2.050.d       | S2.030.c       | 66122.30.d     | S3.002.c       |                |                |
| <b>C-67001</b> | Extr5          | 67001.07.c     | S2.038.d       | S3.002.c       |                |                |                |                |
| <b>C-68145</b> | Extr5          | 68145.24.c     | S2.047.d       | S3.002.c       |                |                |                |                |
| <b>C-68095</b> | Extr5          | 68095.18.c     | S2.037.d       | S3.002.c       |                |                |                |                |
| <b>C-68229</b> | Extr5          | 68229.37.c     | S2.048.d       | S3.002.c       |                |                |                |                |
| <b>C-68154</b> | Extr5          | 68154.29.c     | S2.036.d       | S3.002.c       |                |                |                |                |
| <b>C-67610</b> | Extr5          | 67610.23.c     | S2.049.d       | S3.002.c       |                |                |                |                |
| <b>C-66122</b> | Extr5          | 66122.34.c     | S2.050.d       | S3.002.c       |                |                |                |                |
| <b>B-67001</b> | S2.017.d       | S2.025.c       | 67001.08.d     | S3.002.c       |                |                |                |                |
| <b>B-68145</b> | S2.017.d       | S2.026.c       | 68145.22.d     | S3.002.c       |                |                |                |                |
| <b>B-68095</b> | S2.017.d       | S2.023.c       | 68095.19.d     | S3.002.c       |                |                |                |                |
| <b>B-68229</b> | S2.017.d       | S2.028.c       | 68229.26.d     | S3.002.c       |                |                |                |                |
| <b>B-68154</b> | S2.017.d       | S2.027.c       | 68154.30.d     | S3.002.c       |                |                |                |                |
| <b>B-66122</b> | S2.017.d       | S2.032.c       | 66122.31.d     | S3.002.c       |                |                |                |                |
| <b>A-67001</b> | S2.017.d       | S2.018.c       | 67001.06.d     | S3.002.c       |                |                |                |                |
| <b>A-68145</b> | S2.017.d       | S2.020.c       | 68145.21.d     | S3.002.c       |                |                |                |                |
| <b>A-68095</b> | S2.017.d       | S2.019.c       | 68095.17.d     | S3.002.c       |                |                |                |                |
| <b>A-68229</b> | S2.017.d       | S2.022.c       | 68229.25.d     | S3.002.c       |                |                |                |                |
| <b>A-68154</b> | S2.017.d       | S2.021.c       | 68154.28.d     | S3.002.c       |                |                |                |                |
| <b>A-67610</b> | S2.017.d       | S2.031.c       | 67610.20.d     | S3.002.c       |                |                |                |                |
| <b>A-66122</b> | S2.017.d       | S2.030.c       | 66122.30.d     | S3.002.c       |                |                |                |                |

Supplementary Table S2. Sequences of the primers used to generate the recombinant genomes.

| Name       | 5'→3' sequence                                       |
|------------|------------------------------------------------------|
| 66122.30.d | ATTATAAAGATGGGCTCACCCACTACCAGAAAAGGGATTAACGACTTAT    |
| 66122.31.d | AGAGAAACAGAAGATCAAACATTGGTAATTGCATGGAAGCTCTATTCCAG   |
| 66122.34.c | TTTGAATTTTCGTGGGCTCCAACCTTCTGTGATGAAACTTGGGCGCCCAT   |
| 67001.06.d | ATTATAAAGATGGGCTCACCCACTACCAGAAAAGGGATTAACGACTTAT    |
| 67001.07.c | TTTGAATTTTCGTGGGCTCCAACCTTCTGTGATGAAACTTGGGCGCCCAT   |
| 67001.08.d | AGAGAAACAGAAGATCAAACATTGGTAATTGCATGGAAGCTCTATTCCAG   |
| 67610.20.d | ATTATAAAGATGGGCTCACCCACTACCAGAAAAGGGATTAACGACTTAT    |
| 67610.23.c | TTTGAATTTTCGTGGGCTCCAACCTTCTGTGATGAAACTTGGGCGCCCAT   |
| 68095.17.d | ATTATAAAGATGGGCTCACCCACTACCAGAAAAGGGATTAACGACTTAT    |
| 68095.18.c | TTTGAATTTTCGTGGGCTCCAACCTTCTGTGATGAAACTTGGGCGCCCAT   |
| 68095.19.d | AGAGAAACAGAAGATCAAACATTGGTAATTGCATGGAAGCTCTATTCCAG   |
| 68145.21.d | ATTATAAAGATGGGCTCACCCACTACCAGAAAAGGGATTAACGACTTAT    |
| 68145.22.d | AGAGAAACAGAAGATCAAACATTGGTAATTGCATGGAAGCTCTATTCCAG   |
| 68145.24.c | TTTGAATTTTCGTGGGCTCCAACCTTCTGTGATGAAACTTGGGCGCCCAT   |
| 68154.28.d | ATTATAAAGATGGGCTCACCCACTACCAGAAAAGGGATTAACGACTTAT    |
| 68154.29.c | TTTGAATTTTCGTGGGCTCCAACCTTCTGTGATGAAACTTGGGCGCCCAT   |
| 68154.30.d | AGAGAAACAGAAGATCAAACATTGGTAATTGCATGGAAGCTCTATTCCAG   |
| 68229.25.d | ATTATAAAGATGGGCTCACCCACTACCAGAAAAGGGATTAACGACTTAT    |
| 68229.26.d | AGAGAAACAGAAGATCAAACATTGGTAATTGCATGGAAGCTCTATTCCAG   |
| 68229.27.c | GGGGACTGGTCTTAACATCTATTTTAGATCTTATACTGCAGTGGTCC      |
| 68229.37.c | TTTGAATTTTCGTGGGCTCCAACCTTCTGTGATGAAACTTGGGCGCCCAT   |
| Extr5      | GGGTAATACGACTCACTATAGGGTTAAAACAGCTCTGGGGTTGTTC       |
| S2.017.d   | GGGTAATACGACTCACTATAGGGTTAAAACAGCTCTGGGGTTGTACC      |
| S2.018.c   | ACTATCTTGTACCCTGCCACATATATTGCCTTGTTTTGGTGACCAAACC    |
| S2.019.c   | ATTATTTTATACCCTGCCACATATACGGCCTTGCTTTGATGGCCAAAGCC   |
| S2.020.c   | ACTATCTTGTACCCTGCCACATATATTGCCTTATTTTGGTGACCAAACC    |
| S2.021.c   | CAAATTTTGAAGCCTGCAGTATACACTGCCTTGTTTTGATGTCCAAACC    |
| S2.022.c   | ATTATTTTGTAGCCAGCAAGTATACTGCTTGATTCTGATGTCCAAATCC    |
| S2.023.c   | GGTGGACTAGTCTTGATATCTATCTTCAGGTCTTTGTAAGTATTGGTCC    |
| S2.025.c   | GGTGGGCTAGTCTTGATGTCTATCTTCAGATCCTTGTAAGTATTGGTCC    |
| S2.026.c   | GGTGGGCTAGTCTTAATGTCTATTTCAAATCTTATACTGCAGCGGTCC     |
| S2.027.c   | GGGGGTGATGCTTTATGTCAATCTTAGGTCTTTGTAAGTATTGGTCC      |
| S2.028.c   | GGTGGTGTGGTCTTTATATCTATCTTCAAGTCTTTGTATTGCAATGGGCC   |
| S2.030.c   | CAAATTTTGTATCCTGCCGTGTAAGTCTTTGTTTTGGTGTCCAAATCC     |
| S2.031.c   | CAGATTTTGAACCTGCGGTGTATACTGCTTTGTTTTGATGTCCAAACC     |
| S2.032.c   | GGGGGTGAGGTCTTAATATCTATTTTGAAGTCTTTGTAAGTATTGGTCC    |
| S2.034.d   | AAAAGATTAGGAGAGCTAACATTGGAAATTGTATGGAAGCGCTATTCCAA   |
| S2.036.d   | CACTCCAAACCTCATTAAGATAGTCTTTTGTATACCACATCATTATCATA   |
| S2.037.d   | CACTTTGAAACTCATTGAAATTGTAAGTCTTTGATACCGGATTACTATCACA |
| S2.038.d   | CAGCTTGAATCTCATCAAATTTGATTGTTGATACGACATTATTATCATT    |
| S2.047.d   | CAGCTTGAATCTCATCAAAGTTGATTGTTGATACGACATTATTATCACA    |
| S2.048.d   | TACACCAGATTTAATTAAGCAGTTTTGTTAATTAGATCTACATACCACA    |
| S2.049.d   | CATTGGATTACATACACTTTGCACTTGATTAGTTACGACAGCATCATCACA  |
| S2.050.d   | CACACTAAACCTAATTAGAATTACCTTGTTAATTAGACATTATTATCACA   |
| S3.002.c   | TTTTTTTTTTTTTTTTTTTTTTTTTTTTTCTCCGAATTAAGAAAAATTTAC  |
